# Supplementary material for: Synthesis, Crystal Structure, and Characterization of Energetic Salts Based on 3,5-Diamino-4H-Pyrazol-4-One Oxime
Source: MDPI journal article supplement (doi:10.3390/molecules28010457), 2023-01-03
Supplement: s1 [file s1]

## Supporting information

# Synthesis, Crystal Structure, and Characterization of Energetic Salts Based on 3,5-Diamino-4*H*-Pyrazol-4-One Oxime

Wen-Shuai Dong<sup>1</sup>, Lu Zhang<sup>1</sup>, Wen-Li Cao<sup>1,2</sup>, Zu-Jia Lu<sup>1</sup>, Qamar-un-Nisa Tariq<sup>1</sup>, Chao Zhang<sup>1</sup>, Xiao-Wei Wu<sup>1</sup>, Zong-You Li<sup>1</sup> and Jian-Guo Zhang<sup>1,\*</sup>

<sup>1</sup> State Key Laboratory of Explosion Science and Technology, Beijing Institute of Technology, Beijing 100081, China

<sup>2</sup> China Ordnance Society, Beijing 100089, China

\* Correspondence: zjgbit@bit.edu.cn; Tel.: +86-10-68918091

## Section S1. Crystal structure data

**Table S1.** Bond Lengths for DAPO

| Atom | Atom | Length/Å | Atom | Atom | Length/Å |
|------|------|----------|------|------|----------|
| N1   | N2   | 1.431(3) | N4   | C2   | 1.323(4) |
| N1   | C3   | 1.329(4) | N5   | C3   | 1.330(4) |
| N2   | C1   | 1.310(4) | C1   | C2   | 1.481(4) |
| N3   | C1   | 1.361(4) | C2   | C3   | 1.463(4) |
| N4   | O1   | 1.315(3) |      |      |          |

**Table S2.** Bond Angles for DAPO

| Atom | Atom | Atom | Angle/°  | Atom | Atom | Atom | Angle/°  |
|------|------|------|----------|------|------|------|----------|
| C3   | N1   | N2   | 113.9(2) | N4   | C2   | C1   | 133.2(3) |
| C1   | N2   | N1   | 105.0(2) | N4   | C2   | C3   | 123.4(3) |
| O1   | N4   | C2   | 116.5(2) | C3   | C2   | C1   | 103.4(2) |
| N2   | C1   | N3   | 123.1(3) | N1   | C3   | N5   | 124.8(3) |
| N2   | C1   | C2   | 111.8(3) | N1   | C3   | C2   | 105.9(3) |
| N3   | C1   | C2   | 125.2(3) | N5   | C3   | C2   | 129.2(3) |

**Table S3.** Torsion Angles for DAPO

| A  | B  | C  | D  | Angle/°   | A  | B  | C  | D  | Angle/°   |
|----|----|----|----|-----------|----|----|----|----|-----------|
| N1 | N2 | C1 | N3 | 178.7(3)  | N4 | C2 | C3 | N1 | 178.6(3)  |
| N1 | N2 | C1 | C2 | -0.4(3)   | N4 | C2 | C3 | N5 | -1.3(5)   |
| N2 | N1 | C3 | N5 | 179.2(3)  | O1 | N4 | C2 | C1 | -1.9(5)   |
| N2 | N1 | C3 | C2 | -0.7(3)   | O1 | N4 | C2 | C3 | -179.4(3) |
| N2 | C1 | C2 | N4 | -177.9(3) | C1 | C2 | C3 | N1 | 0.4(3)    |
| N2 | C1 | C2 | C3 | 0.0(4)    | C1 | C2 | C3 | N5 | -179.5(3) |
| N3 | C1 | C2 | N4 | 3.0(6)    | C3 | N1 | N2 | C1 | 0.7(3)    |
| N3 | C1 | C2 | C3 | -179.1(3) |    |    |    |    |           |

**Table S4.** Bond Lengths for DAPOC

| Atom | Atom | Length/Å | Atom | Atom | Length/Å |
|------|------|----------|------|------|----------|
| N2   | C3   | 1.330(4) | N3   | C2   | 1.285(3) |
| O1   | N3   | 1.359(3) | C3   | N5   | 1.305(3) |
| N4   | N5   | 1.425(3) | C3   | C2   | 1.480(4) |
| N4   | C1   | 1.316(3) | C2   | C1   | 1.468(4) |
| N1   | C1   | 1.313(4) |      |      |          |

**Table S5.** Bond Angles for DAPOC

| Atom | Atom | Atom | Angle/°  | Atom | Atom | Atom | Angle/°  |
|------|------|------|----------|------|------|------|----------|
| C1   | N4   | N5   | 113.2(2) | N3   | C2   | C3   | 134.7(3) |
| C2   | N3   | O1   | 112.9(2) | N3   | C2   | C1   | 121.6(2) |
| N2   | C3   | C2   | 124.8(2) | C1   | C2   | C3   | 103.7(2) |
| N5   | C3   | N2   | 124.8(3) | N4   | C1   | C2   | 106.1(2) |
| N5   | C3   | C2   | 110.3(2) | N1   | C1   | N4   | 127.3(2) |
| C3   | N5   | N4   | 106.6(2) | N1   | C1   | C2   | 126.6(2) |

**Table S6.** Torsion Angles for DAPOC

| A  | B  | C  | D  | Angle/°   | A  | B  | C  | D  | Angle/°   |
|----|----|----|----|-----------|----|----|----|----|-----------|
| N2 | C3 | N5 | N4 | -178.2(3) | C3 | C2 | C1 | N1 | 179.4(3)  |
| N2 | C3 | C2 | N3 | -0.1(5)   | N5 | N4 | C1 | N1 | -179.0(2) |
| N2 | C3 | C2 | C1 | 178.1(3)  | N5 | N4 | C1 | C2 | -0.3(3)   |
| O1 | N3 | C2 | C3 | -1.6(4)   | N5 | C3 | C2 | N3 | -178.9(3) |
| O1 | N3 | C2 | C1 | -179.4(2) | N5 | C3 | C2 | C1 | -0.8(3)   |
| N3 | C2 | C1 | N4 | 179.0(2)  | C2 | C3 | N5 | N4 | 0.6(3)    |
| N3 | C2 | C1 | N1 | -2.2(4)   | C1 | N4 | N5 | C3 | -0.2(3)   |
| C3 | C2 | C1 | N4 | 0.6(3)    |    |    |    |    |           |

**Table S7.** Bond Lengths for DAPOP

| Atom | Atom | Length/Å | Atom | Atom | Length/Å |
|------|------|----------|------|------|----------|
| C11  | O3   | 1.436(5) | N4   | C2   | 1.296(6) |
| C11  | O4   | 1.419(5) | N5   | C3   | 1.313(8) |
| C11  | O5   | 1.431(5) | N6   | N7   | 1.427(7) |
| C11  | O6   | 1.450(5) | N6   | C6   | 1.323(6) |
| C12  | O7   | 1.417(5) | N7   | C4   | 1.324(7) |
| C12  | O8   | 1.417(6) | N8   | C4   | 1.302(7) |
| C12  | O9   | 1.432(6) | N9   | O2   | 1.339(6) |
| C12  | O10  | 1.423(5) | N9   | C5   | 1.287(6) |
| N1   | N2   | 1.407(7) | N10  | C6   | 1.325(7) |
| N1   | C3   | 1.323(7) | C1   | C2   | 1.493(6) |
| N2   | C1   | 1.324(6) | C2   | C3   | 1.478(7) |
| N3   | C1   | 1.342(7) | C4   | C5   | 1.473(7) |
| N4   | O1   | 1.336(5) | C5   | C6   | 1.486(7) |

**Table S8.** Bond Angles for DAPOP

| Atom | Atom | Atom | Angle/°  | Atom | Atom | Atom | Angle/°  |
|------|------|------|----------|------|------|------|----------|
| O3   | C11  | O6   | 108.7(3) | N2   | C1   | N3   | 124.9(4) |
| O4   | C11  | O3   | 109.2(3) | N2   | C1   | C2   | 110.0(4) |
| O4   | C11  | O5   | 111.2(4) | N3   | C1   | C2   | 125.1(4) |
| O4   | C11  | O6   | 110.2(3) | N4   | C2   | C1   | 133.0(5) |
| O5   | C11  | O3   | 107.8(4) | N4   | C2   | C3   | 123.6(5) |
| O5   | C11  | O6   | 109.7(3) | C3   | C2   | C1   | 103.4(4) |
| O7   | C12  | O8   | 105.1(4) | N1   | C3   | C2   | 105.6(5) |
| O7   | C12  | O9   | 111.3(4) | N5   | C3   | N1   | 127.8(5) |
| O7   | C12  | O10  | 111.8(4) | N5   | C3   | C2   | 126.5(5) |
| O8   | C12  | O9   | 107.9(5) | N7   | C4   | C5   | 105.7(5) |
| O8   | C12  | O10  | 107.6(4) | N8   | C4   | N7   | 128.8(5) |
| O10  | C12  | O9   | 112.7(5) | N8   | C4   | C5   | 125.5(5) |
| C3   | N1   | N2   | 114.5(4) | N9   | C5   | C4   | 122.7(5) |
| C1   | N2   | N1   | 106.4(4) | N9   | C5   | C6   | 133.4(5) |

|    |    |    |          |     |    |     |          |
|----|----|----|----------|-----|----|-----|----------|
| C2 | N4 | O1 | 112.4(4) | C4  | C5 | C6  | 104.0(4) |
| C6 | N6 | N7 | 106.0(4) | N6  | C6 | N10 | 124.2(5) |
| C4 | N7 | N6 | 114.0(4) | N6  | C6 | C5  | 110.3(5) |
| C5 | N9 | O2 | 114.0(4) | N10 | C6 | C5  | 125.5(4) |

**Table S9.** Torsion Angles for DAPOP

| A  | B  | C  | D   | Angle/°   | A  | B  | C  | D   | Angle/°   |
|----|----|----|-----|-----------|----|----|----|-----|-----------|
| N1 | N2 | C1 | N3  | 180.0(5)  | N7 | C4 | C5 | C6  | 0.1(5)    |
| N1 | N2 | C1 | C2  | 0.8(6)    | N8 | C4 | C5 | N9  | -0.1(9)   |
| N2 | N1 | C3 | N5  | 178.6(6)  | N8 | C4 | C5 | C6  | 178.7(5)  |
| N2 | N1 | C3 | C2  | 1.2(6)    | N9 | C5 | C6 | N6  | 179.2(5)  |
| N2 | C1 | C2 | N4  | 179.6(5)  | N9 | C5 | C6 | N10 | 0.4(9)    |
| N2 | C1 | C2 | C3  | -0.1(6)   | O1 | N4 | C2 | C1  | 0.2(8)    |
| N3 | C1 | C2 | N4  | 0.4(9)    | O1 | N4 | C2 | C3  | 179.9(5)  |
| N3 | C1 | C2 | C3  | -179.3(5) | O2 | N9 | C5 | C4  | 179.5(4)  |
| N4 | C2 | C3 | N1  | 179.6(5)  | O2 | N9 | C5 | C6  | 1.1(8)    |
| N4 | C2 | C3 | N5  | 2.1(9)    | C1 | C2 | C3 | N1  | -0.6(6)   |
| N6 | N7 | C4 | N8  | -179.3(6) | C1 | C2 | C3 | N5  | -178.1(6) |
| N6 | N7 | C4 | C5  | -0.7(6)   | C3 | N1 | N2 | C1  | -1.3(6)   |
| N7 | N6 | C6 | N10 | 177.8(5)  | C4 | C5 | C6 | N6  | 0.6(5)    |
| N7 | N6 | C6 | C5  | -1.0(6)   | C4 | C5 | C6 | N10 | -178.2(5) |
| N7 | C4 | C5 | N9  | -178.7(5) | C6 | N6 | N7 | C4  | 1.1(6)    |

**Table S10.** Bond Lengths for DAPOT

| Atom | Atom | Length/Å | Atom | Atom | Length/Å  |
|------|------|----------|------|------|-----------|
| O1   | C4   | 1.225(8) | N5   | C3   | 1.276(8)  |
| O2   | N6   | 1.185(8) | N6   | C5   | 1.478(8)  |
| O3   | N6   | 1.202(8) | N7   | C7   | 1.449(9)  |
| O4   | N7   | 1.234(8) | N8   | C9   | 1.452(9)  |
| O5   | N7   | 1.222(8) | C1   | C2   | 1.471(10) |
| O6   | N8   | 1.214(8) | C2   | C3   | 1.474(9)  |

|     |    |          |    |    |           |
|-----|----|----------|----|----|-----------|
| O7  | N8 | 1.195(7) | C4 | C5 | 1.414(9)  |
| O11 | N4 | 1.335(7) | C4 | C9 | 1.479(9)  |
| N1  | N2 | 1.382(8) | C5 | C6 | 1.361(9)  |
| N1  | C3 | 1.320(8) | C6 | C7 | 1.367(10) |
| N2  | C1 | 1.292(9) | C7 | C8 | 1.354(10) |
| N3  | C1 | 1.319(9) | C8 | C9 | 1.370(10) |
| N4  | C2 | 1.268(9) |    |    |           |

**Table S11.** Bond Angles for DAPOT

| Atom | Atom | Atom | Angle/°  | Atom | Atom | Atom | Angle/°  |
|------|------|------|----------|------|------|------|----------|
| C3   | N1   | N2   | 113.9(5) | N5   | C3   | N1   | 126.6(6) |
| C1   | N2   | N1   | 108.0(6) | C2   | C3   | N1   | 104.7(6) |
| C2   | N4   | O11  | 112.8(6) | C2   | C3   | N5   | 128.6(7) |
| O3   | N6   | O2   | 122.3(7) | C5   | C4   | O1   | 125.9(6) |
| C5   | N6   | O2   | 119.6(6) | C9   | C4   | O1   | 122.1(6) |
| C5   | N6   | O3   | 118.1(7) | C9   | C4   | C5   | 112.0(6) |
| O5   | N7   | O4   | 122.7(7) | C4   | C5   | N6   | 119.7(6) |
| C7   | N7   | O4   | 117.9(7) | C6   | C5   | N6   | 115.3(6) |
| C7   | N7   | O5   | 119.3(8) | C6   | C5   | C4   | 125.0(6) |
| O7   | N8   | O6   | 122.6(7) | C7   | C6   | C5   | 118.8(7) |
| C9   | N8   | O6   | 115.6(7) | C6   | C7   | N7   | 119.1(7) |
| C9   | N8   | O7   | 121.8(6) | C8   | C7   | N7   | 118.6(7) |
| N3   | C1   | N2   | 128.7(7) | C8   | C7   | C6   | 122.2(7) |
| C2   | C1   | N2   | 109.7(6) | C9   | C8   | C7   | 119.6(7) |
| C2   | C1   | N3   | 121.6(7) | C4   | C9   | N8   | 119.8(6) |
| C1   | C2   | N4   | 124.7(7) | C8   | C9   | N8   | 117.8(7) |
| C3   | C2   | N4   | 131.6(7) | C8   | C9   | C4   | 122.3(7) |
| C3   | C2   | C1   | 103.7(6) |      |      |      |          |

**Table S12.** Torsion Angles for DAPOT

| A   | B  | C  | D  | Angle/° | A  | B  | C  | D  | Angle/° |
|-----|----|----|----|---------|----|----|----|----|---------|
| O1  | C4 | C5 | N6 | 0       | N1 | N2 | C1 | C2 | 0       |
| O1  | C4 | C5 | C6 | 180     | N1 | C3 | C2 | N4 | 180     |
| O1  | C4 | C9 | N8 | 0       | N1 | C3 | C2 | C1 | 0       |
| O1  | C4 | C9 | C8 | 180     | N2 | C1 | C2 | N4 | 180     |
| O2  | N6 | C5 | C4 | 0       | N2 | C1 | C2 | C3 | 0       |
| O2  | N6 | C5 | C6 | 180     | N3 | C1 | C2 | N4 | 0       |
| O3  | N6 | C5 | C4 | 180     | N3 | C1 | C2 | C3 | 180     |
| O3  | N6 | C5 | C6 | 0       | N4 | C2 | C3 | N5 | 0       |
| O4  | N7 | C7 | C6 | 0       | N5 | C3 | C2 | C1 | 180     |
| O4  | N7 | C7 | C8 | 180     | N6 | C5 | C4 | C9 | 180     |
| O5  | N7 | C7 | C6 | 180     | N6 | C5 | C6 | C7 | 180     |
| O5  | N7 | C7 | C8 | 0       | N7 | C7 | C6 | C5 | 180     |
| O6  | N8 | C9 | C4 | 180     | N7 | C7 | C8 | C9 | 180     |
| O6  | N8 | C9 | C8 | 0       | N8 | C9 | C4 | C5 | 180     |
| O7  | N8 | C9 | C4 | 0       | N8 | C9 | C8 | C7 | 180     |
| O7  | N8 | C9 | C8 | 180     | C4 | C5 | C6 | C7 | 0       |
| O11 | N4 | C2 | C1 | 180     | C4 | C9 | C8 | C7 | 0       |
| O11 | N4 | C2 | C3 | 0       | C5 | C6 | C7 | C8 | 0       |
| N1  | N2 | C1 | N3 | 180     | C6 | C7 | C8 | C9 | 0       |

## Section S2. Calculation of formation enthalpy

Firstly, the enthalpy of formation of neutral molecule is required. The molecular formula of DAPO is  $C_3H_5N_5O$ . According to the definition of enthalpy of formation, the enthalpy of formation of DAPO is equal to its enthalpy minus the enthalpy of the most stable element. The calculation formula is as follows:

$$\Delta_f H_m^\theta(M) = H(M) - 3H(C(g)) - \frac{5}{2}H(H_2) - \frac{5}{2}H(N_2) - \frac{1}{2}H(O_2) + 3(C(s))$$

The above enthalpy values are calculated quantitatively. All structures were optimized under B3PW91/6-31G (d, p), and then calculated under PWPB95D3/def2-QZVPP with high precision single

point energy. After zero-point energy correction, their enthalpy values were obtained respectively. Because the steady state of carbon in the standard state is the solid phase, the enthalpy of the gas phase is quantified, so the standard molar enthalpy of sublimation of the carbon needs to be added. Then, according to the enthalpy of formation of the neutral molecule, the enthalpy of formation of its cation  $M^+$  can be calculated, and the calculation formula is as follows:

$$\Delta_f H_m^\theta(M^+) = \Delta_f H_m^\theta(M) - \Delta_f H_m^\theta(H^+) - H(M) + H(H^+) + H(M^+)$$

Then, according to the empirical formula, the lattice energy of the ionic salt  $\Delta H_L$  was calculated:

$$U_{POT}/\text{KJ mol}^{-1} = \gamma(\rho_m/M_m)^{1/3} + \sigma$$

$$\Delta H_L = U_{POT} + [p(\eta_M/2-2) + q(\eta_X/2-2)]/RT$$

Finally, according to the Born-Haber cycle, the enthalpy of formation of ionic salts can be calculated as follows:

$$\Delta_f H_m^\theta(\text{salt}) = \Delta_f H_m^\theta(\text{cation}) + \Delta_f H_m^\theta(\text{anion}) - \Delta H_L$$

The anions involved in the calculation of DAPOP and DAPOT are perchlorate and picrate, and their formation enthalpies are calculated using the G4 thermodynamic combination method in a process similar to the calculation of cation formation enthalpies. The enthalpy of formation of protons is derived from the National Institute of Standards and Technology (NIST).
